# Supplementary material
Source: publisher figshare collection journal article supplement (https://acs.figshare.com/ndownloader/files/5154478)
Supplement: Supplementary file 1 [file 5154478]

## *Quantification of Variability and Uncertainty for Air Toxic Emission Inventories With Censored Emission Factor Data*

H. Christopher Frey\* and Yuchao Zhao  
Department of Civil, Construction, and Environmental Engineering  
North Carolina State University  
Campus Box 7908  
Raleigh, NC 27695-7908

Email: [frey@eos.ncsu.edu](mailto:frey@eos.ncsu.edu)  
Tel: (919) 515-1155  
Fax: (919) 515-7908

### **Supporting Information**

The objective of this paper is to develop probabilistic emission inventories (EI) of benzene, formaldehyde and chromium for the Houston area. A key step is to quantify variability. In this Supporting Information, the likelihood functions of Maximum Likelihood Estimation for censored data are given for lognormal, gamma and Weibull distributions. The estimated variability and uncertainty in the emission factors for benzene, formaldehyde, chromium and arsenic are summarized in Tables S-1 to S-4. Empirical emission factor data sources for benzene, formaldehyde, chromium and arsenic are summarized in Tables S-5 to S-8, respectively. The method and results of quantification of uncertainty in emission factors for mobile sources and aggregation of subcategories for petroleum refineries are described. The uncertainty range in the chromium emission factor from petroleum refineries-catalytic cracking is explained. The selection of a preferred distribution type for a censored emission factor with a single detection limit is illustrated. The uncertainties in the total emission inventories are given graphically for benzene, formaldehyde, chromium and arsenic.

### **Maximum Likelihood Estimation**

The likelihood function for data without censoring is:

$$L(\theta_1, \theta_2, \dots, \theta_k) = \prod_{i=1}^n f(x_i | \theta_1, \theta_2, \dots, \theta_k) \quad (1)$$

Where,

$\theta_1, \theta_2, \dots, \theta_k$  = Parameters of the distribution

$x_i$  = Values of random variable, for,  $i = 1, 2, \dots, n$

$n$  = Number of data points in the data set

$f()$  = Probability density function

The likelihood function for censored data sets having multiple detection limits is: (23, 24)

$$L(\theta_1, \theta_2, \dots, \theta_k) = \prod_{i=1}^n f(x_i | \theta_1, \theta_2, \dots, \theta_k) \left\{ \prod_{m=1}^p \left( \prod_{j=1}^{ND_m} F(DL_m | \theta_1, \theta_2, \dots, \theta_k) \right) \right\} \quad (2)$$

Where,

$\theta_1, \theta_2, \dots, \theta_k$  = Parameters of the distribution

$x_i$  = Detected data point, where,  $i = 1, 2, \dots, n$

$ND_m$  = Number of non-detects corresponding to detection limit  $DL_m$ ,

where,  $m = 1, 2, \dots, P$ .

$P$  = Number of detection limits

$f()$  = Probability density function

$F()$  = Cumulative distribution function

According to equation (2), for the lognormal distribution, the log-likelihood function including left-censored data is given by: (23, 24)

$$J(\mu, \sigma) = -n \ln \sigma - \frac{n}{2} \ln(2\pi) - \sum_{i=1}^n \left\{ \frac{(\ln x_i - \mu)^2}{2\sigma^2} \right\} + \sum_{m=1}^p ND_m \ln \left\{ 0.5 \left[ 1 + \operatorname{erf} \left( \frac{\ln DL_m - \mu}{\sigma\sqrt{2}} \right) \right] \right\} \quad (3)$$

For the gamma distribution, the log-likelihood function including left-censored data is given by: (23, 24)

$$J(\alpha, \beta) = -n \left\{ \alpha \ln(\beta) + \ln[\Gamma(\alpha)] \right\} + \sum_{i=1}^n \left\{ (\alpha - 1) \ln(x_i) - \frac{x_i}{\beta} \right\} + \sum_{m=1}^p ND_m \ln \left\{ \frac{\int_0^{DL_m/\beta} e^{-t} t^{\alpha-1} dt}{\Gamma(\alpha)} \right\} \quad (4)$$

For the Weibull distribution, the log-likelihood function including left-censored data is given by: (23, 24)

$$J(\alpha, \beta) = -n \left( \frac{\alpha}{\beta} \right) + \sum_{i=1}^n \left\{ (\alpha - 1) \ln \left( \frac{x_i}{\beta} \right) - \left( \frac{x_i}{\beta} \right)^\alpha \right\} + \sum_{m=1}^p ND_m \ln \left[ 1 - \exp \left[ - \left( \frac{DL}{\beta} \right)^\alpha \right] \right] \quad (5)$$

### Empirical Emission Factor Data

Empirical emission factor data of benzene, formaldehyde, chromium and arsenic were obtained for most source categories. For some source categories, reasonable surrogate data were used. The data status with regard to whether directly relevant or surrogate data were used for particular source category are summarized in Tables S-5 to S-8 for each source category for the four pollutants. The references for the data sources are given in Tables S-5 to S-8.

### Quantification of Uncertainty in Emission Factors for Mobile Sources

For benzene and formaldehyde, data were available to quantify uncertainty in emission factors for mobile sources. Previous work regarding uncertainty estimates has been done for total hydrocarbon emissions for both onroad and nonroad sources (5, 7, 8). The uncertainty in the fraction of benzene and formaldehyde in total organic gas emissions has also been estimated for onroad LDGV sources (38). Therefore, quantification of uncertainty in benzene and formaldehyde emission factors in gasoline mobile sources is based upon the results from previous work. For diesel mobile sources, the uncertainties in the THC emission factors and the

fraction of benzene and formaldehyde in THC emissions were quantified based upon empirical data (36) using bootstrap simulation. The uncertainty in benzene and formaldehyde emission factors was quantified based on the products of the uncertainties in THC emissions and percent of THC emitted as an air toxic. Here, the model used to quantify the uncertainty for benzene and formaldehyde from mobile sources is introduced.

The air toxic emission factors for gasoline mobile sources for either benzene or formaldehyde is given by:

$$EF_{\text{toxic}} = EF_{\text{THC}} \times F_{\text{toxic/TOG}} / 100 \times F_{\text{TOG/THC}} \quad (6)$$

Where,

$EF_{\text{toxic}}$  = Toxic Emission factor (unit: g/mi for onroad mobile sources; g/hp-hr for nonroad lawn and garden engines; g/kWh for nonroad construction, farm and industrial engines)

$EF_{\text{THC}}$  = THC emission factor (unit: g/mi for onroad mobile sources; g/hp-hr for nonroad lawn and garden engines; g/kWh for nonroad construction, farm and industrial engines)

$F_{\text{toxic/TOG}}$  = Toxic emission fraction (unit: % of TOG mass emitted as the selected air toxic)

$F_{\text{TOG/THC}}$  = Mass Ratio of TOG to THC emissions

The air toxic emission factors for diesel mobile sources for either benzene or formaldehyde is given by:

$$EF_{\text{toxic}} = EF_{\text{THC}} \times F_{\text{toxic/THC}} \quad (7)$$

Where,

$F_{\text{toxic/THC}}$  = Toxic emission fraction (unit: % of THC mass emitted as the selected air toxic)

Most hydrocarbon emission data from mobile sources is measured as total hydrocarbon. THC is measured using a Flame Ionization Detector (FID) calibrated with propane (*SI-1*). The FID is assumed to respond to all hydrocarbons identically as it responds to propane in determining the concentration of carbon atoms in a gas sample. Most hydrocarbons respond nearly identically as propane with notable exceptions being oxygenated hydrocarbons such as alcohols and aldehydes commonly found in engine exhaust. Because alcohols and especially aldehydes are chemically reactive and therefore ozone-forming hydrocarbons, the California Air Resources Board defined a measurement that adds the THC and oxygenated compounds into a quantify referred to as total organic gas (TOG). The oxygenated components are measured by collecting aldehydes on dinitro-phenylhydrazine impregnated filter traps and alcohols in chilled water impingers. The aldehydes and alcohols are extracted and measured using chromatography to determine emission rates. The mass ratio of TOG/THC is approximately equal to 1 for mobile sources (*SI-1*). EPA often uses the toxic fraction, developed as a percentage of the toxic compound of interest contained in TOG, to calculate the toxic emission estimates for mobile source. Previous work was done by Bammi to analyze the ratio of toxics emission in total TOG for LDGV (38). Therefore,  $F_{\text{toxic/TOG}}$  is used instead of  $F_{\text{toxic/THC}}$  for gasoline mobile sources.

For diesel mobile sources, empirical emission factor data for THC, benzene and formaldehyde were available (36). A similar procedure as for gasoline mobile sources was applied in order to quantify the uncertainty in the benzene and formaldehyde emission factors.

However, since no data were reported by CRC for TOG from diesel mobile sources, toxic emission fraction in THC,  $F_{\text{toxic}/\text{THC}}$  is used (36).

Since the objective of this work is to quantify the relative uncertainty in emission factors, each input in Equations (6) and (7) was normalized to its respective mean value to obtain:

$$UF_{\text{toxic}} = UF_{\text{THC}} \times UF_{\text{toxic}/\text{TOG}} \times UF_{\text{TOG}/\text{THC}} \quad (8)$$

or 
$$UF_{\text{toxic}} = UF_{\text{THC}} \times UF_{\text{toxic}/\text{THC}} \quad (9)$$

Where,

$UF_{\text{toxic}}$  = Normalized uncertainty factor for  $EF_{\text{toxic}}$

$UF_{\text{THC}}$  = Normalized uncertainty factor for  $EF_{\text{THC}}$

$UF_{\text{toxic}/\text{TOG}}$  = Normalized uncertainty factor for  $F_{\text{toxic}/\text{TOG}}$

$UF_{\text{TOG}/\text{THC}}$  = Normalized uncertainty factor for  $F_{\text{TOG}/\text{THC}}$

$UF_{\text{toxic}/\text{THC}}$  = Normalized uncertainty factor for  $F_{\text{toxic}/\text{THC}}$

Figure S-1 illustrates the use of Equation (9) to calculate the uncertainty in benzene emission factors from onroad diesel mobile sources.

### **Quantification of Uncertainty in Aggregated Source Categories**

Case 3 for benzene, Cases 1, 2, 3, 6 and 11 for formaldehyde and Case 12 for chromium are aggregations of several subcategories. For such categories, emissions data are available for subcategories but not for the aggregated emissions among all source categories. Therefore, the uncertainty for the main source category was obtained based on the weighted average uncertainty from the subcategories. The weight assigned to each subcategory is based on the relationship between the subcategories. However, the information to determine the relationship is not available for most cases and thus assumptions were made.

For Case No. 3 of the petroleum refinery source category in Table S-1, an approximate weight for each subcategory was defined based on the gasoline marketing distribution system in the United States (34). The scheme of the distribution system is shown in Figure S-2. According to the scheme and the subcategories for which empirical data are available, including Case Nos. 3a to 3i in Table S-1, Source No. 3 was taken as the combination of the following six subcategories:

1. Petroleum refinery storage tanks (PRST) represented by Case No. 3i;
2. Bulk terminal (BT) represented by Case Nos. 3a, 3b and 3c;
3. Typical bulk plant (TBP) represented by Case Nos. 3a and 3d;
4. Storage losses at typical pipeline breakout station (TPBS) represented by Case Nos. 3e and 3f;
5. Service station (TSS) represented by Case No. 3g; and
6. Emissions from wastewater (WW) represented by Case No. 3h.

For the subcategories of BT, TBP and TPBS, there are several subcomponents. First, the weights for the six subcategories were defined. Then, the weights were defined for the subcomponents in BT, TBP and TPBS.

According to the scheme of the distribution system, PRST and BT are on the main flow of the distribution system, and TBP, TPBS, and TSS are with respect to partial flow of the distribution system. Therefore, the subcategories on the main flow of the distribution system were assigned relative weights of one unit, and the emission sources on the partial flow were assigned relative weights of 0.5 unit. Wastewater collection and treatment is not shown in Figure S-2 and there is no available information to determine the emissions of air toxics from WW relative to the total emissions from petroleum refinery. According to EPA, air emissions from

petroleum refinery wastewater collection and treatment are one of the largest sources of VOC emissions at a refinery. (34) Therefore, for purposes of calculation, the WW subcategory was assigned a relative weight of one unit. The weight of each subcategory was obtained by its relative weight divided by the sum of all the relative weights, which equals to 4.5 units. Thus the weighted uncertainty factor for Source 3 is calculated as:

$$UF_3 = (UF_{PRST} + UF_{BT} + 0.5 \times UF_{TBP} + 0.5 \times UF_{TBPS} + 0.5 \times UF_{TSS} + UF_{ww})/4.5 \quad (10)$$

Where,  $UF_3$ ,  $UF_{PRST}$ ,  $UF_{BT}$ ,  $UF_{TBP}$ ,  $UF_{TBPS}$ ,  $UF_{TSS}$  and  $UF_{ww}$  are normalized uncertainty factors of benzene emission factors from these subcategories, PRST, BT, TBP, TBPS, TSS and WW, respectively.

Since subcategories BT, TBP and TBPS are each composed of several subcomponents, a weight was needed for each subcomponent. For components that represent different processes, equal weights were assigned to each component. For example, weights of 0.5 were assigned to subcomponents 3a and 3d in subcategory TBP. If the components represent different seasons, a weight of  $\frac{3}{4}$  was assigned to the non-winter season and  $\frac{1}{4}$  was assigned to winter season on the assumption that winter corresponds to three winter months per year. For example, a weight of  $\frac{3}{4}$  was assigned to 3e and  $\frac{1}{4}$  was assigned to 3f in TBPS. For BT, there are two levels of subcomponents. In the first level, gasoline loading racks at bulk terminal, subcategory 3a, was one subcomponent and was assigned a weight of  $\frac{1}{2}$ . Storage losses at gasoline bulk terminal (SLGBT) composed of Case Nos. 3b and 3c was other subcomponent and was assigned a weight of  $\frac{1}{2}$ . In the second level, weights were assigned to 3b and 3c in SLGBT. Since 3b is for the nonwinter season, it was assigned a weight of  $\frac{3}{4}$ . Similarly, since 3c is for the winter season, it was assigned a weight of  $\frac{1}{4}$ .



Based on the weighted average, the 95 percent confidence interval of the mean emission factors for Source No. 3 was obtained as minus 55 percent to plus 158 percent. This is less than the range of uncertainty for most of the subcategories. The reason is that there is no correlation of the uncertainty factors among the subcategories. For comparison, uncertainty was also estimated for a straight arithmetic average of all subcategories. The resulting 95 percent relative confidence interval of the mean is from minus 53 percent to plus 127 percent. Although there is some difference in the two results at the upper level of the range, the two results are comparable in magnitude. Therefore, although the method for determining the weight of each subcategory is approximate, the final results are not strongly sensitive to the weights for this case.

Formaldehyde nonroad and onroad mobile sources are the two largest source categories of the emission inventory, which are listed as source Nos. 1 and 2 in Table S-2, respectively. For nonroad mobile sources, the emission factors are available for nonroad-4-stroke gasoline lawn and garden engines, nonroad-2-stroke gasoline lawn and garden engines, nonroad diesel engines and nonroad aircraft engines. Therefore, the nonroad mobile source is taken as the of the above subcategories. The uncertainty estimate in nonroad mobile source emissions is obtained based on the weighted average of the uncertainties in the emissions from the above subcategories.

For onroad mobile sources, the emission factors are available for onroad gasoline engines and onroad diesel engines. Therefore, the onroad mobile source is taken as the aggregation of the subcategories of onroad gasoline engines and onroad diesel engines. The uncertainty estimate in onroad mobile source emissions is obtained based on the weighted average of the uncertainties in the emissions from these two subcategories. The fractions of the emission from each subcategory with respect to the total emission from Source No. 1 or 2 was taken as the weight for the corresponding subcategory.

For nonroad mobile sources, the distribution of emissions from gasoline, diesel and aircraft nonroad sources is available for Houston area, as shown in Table S-2. However, there is no information regarding the distribution of emissions among 4-stroke and 2-stroke lawn and garden gasoline engines for Houston. Information regarding the distribution of emissions from these two subcategories is available for another urban area, specifically Jacksonville, Florida, and is used as the basis for estimating the weights for 4-stroke (Source No. 1a) and 2-stroke lawn and garden gasoline engines (Source No. 1b). In particular, the fractions of the emission from 4-stroke and 2-stroke engines in the total emissions from nonroad gasoline engines in Jacksonville are taken as the weights of Source No. 1a and 1b in order to get the weighted average uncertainty for nonroad engines. For example, for Source No. 1 in Table S-2, the fraction of total emissions attributable to subcategory 1a is estimated as 0.156 based upon the Jacksonville inventory. Therefore, the estimated weight for subcategory 1b is as 0.844.

The weights of the subcategories of the gasoline nonroad mobile source, diesel nonroad mobile source and aircraft source formaldehyde emissions are estimated according to the Houston emission inventory, as shown in Table S-2. For example, for onroad mobile sources, the emissions from subcategories of 2a and 2b are estimated to be 764 and 213 tons/yr, respectively. Therefore, the weight for 2a is calculated as 0.782, and the weight for 2b is calculated as 0.218. Thus, the weights for all the subcategories of Source Nos. 1 and 2 for formaldehyde are obtained.

For Source Nos. 3, 6 and 11 in Table S-2, there is no breakdown available regarding the formaldehyde emissions for each subcategory in Houston. As an approximate assumption, equal weights were assigned to each subcategory within these three major categories. That is, for Source Nos. 3 and 6, it is assumed that liquid fuel and gas fuel contribute equally to uncertainty. For Source No. 11, it is assumed that coal combustion, wood fired waste combustion and fuel oil

combustion contribute equally to the uncertainty in the emissions. For Source No. 3, the uncertainty in subcategories 3a and 3b are relatively large compared to other source categories; thus, the resulting weighed average uncertainty for Source No. 3 will still be relatively large no matter what weights are assigned for each subcategory. Therefore, the uncertainty results are insensitive to the choice of a weight and are robust in the absence of data regarding what the weight should be. For Source Nos. 6 and 11, from the sensitivity study, the uncertainty in the total emissions has a small correlation to the emission factor uncertainty in these two cases. Therefore, the uncertainties associated with weights for these cases are not important to the uncertainty in total emissions.

For Source No. 12 of Chromium emission factors from oil and gas fired machinery manufacturing, there is no breakdown available for oil and gas fired sources from Houston, thus the fractions of the emissions for oil industry combustion and gas industry combustion based on data available from Jacksonville are used as the weights, which are 0.55 and 0.45, respectively (*SI-2*).

Based on the approaches described here, the 95 percent confidence intervals of the mean of benzene, formaldehyde and chromium emission factors were obtained for the source categories composed of several subcategories. There is no similar issue for arsenic emission inventory. The results for benzene, formaldehyde and chromium emission factors from aggregated source categories are shown in Tables S-2, S-3 and S-4, respectively.

### **Uncertainty in Chromium Emission Factors from Petroleum Refineries – Catalytic Cracking**

The uncertainty range in the chromium emission factors from the largest source category, petroleum refineries-catalytic cracking is only from minus 1.5 percent to plus 1.0 percent based

on available data sets reported by CARB (35) since the reported data are close to each other in value. The uncertainty range in chromium emission factors from this source category is reported as 3.05% by CARB (35) but no information is available regarding how this uncertainty is quantified. The uncertainty in the other heavy metal emission factors from this source category is reported as typically much larger than that for chromium by CARB (35). Future work is needed to evaluate the uncertainty in chromium emission factors from petroleum refineries-catalytic cracking when new data become available.

### **Selection of a Preferred Distribution Type for Censored Emission Factor with Single Detection Limit**

The selection of a preferred distribution for a censored case with a single detection limit is illustrated by the chromium emission factor for Case 26, industrial residual oil boilers. The emission factor data contain 12 detected values and 1 censored value. The lognormal, gamma and Weibull distributions are judged to be adequate fits. Figures S-4, S-5 and S-6 show the variability and uncertainty for this case based upon the lognormal, gamma and Weibull distributions, respectively. The 50 percent confidence interval for the CDF based on the lognormal distribution enclosed the most data points. The lognormal distribution was selected as the preferred distribution.

### **Uncertainty in Total Emission Inventories**

The uncertainties in the total urban air toxics emissions are shown by the cumulative probability distributions of the normalized uncertainty factors in Figures S-8 to S-14 for the four pollutants. The results based on both correlated surrogates and uncorrelated surrogates are given.

## **REFERENCES**

S-1. Lindhjem, C.E. (1997), "Conversion Factors for Hydrocarbon Emission Components," Assessment and Modeling Division, U.S. Environmental Agency Office of Mobile Sources.

<http://www.epa.gov/otaq/regs/toxics/r99029.pdf>

S-2. Tilley, L. (2003), Personal communication with Lori Tilley, Regulatory and Environmental Services Department, City of Jacksonville, FL, via email, May 26<sup>th</sup>, 2003.

S-3. CARB, *Development of Toxics Emission Factors from Source Test Data Collected under the Air Toxics Hot Spots Program: Volume 2*. Research Division, Air Resources Board, California Environmental Protection Agency, 1996. Contract No. 92-338.

**Table S-1.** Quantification of Variability and Uncertainty for Benzene Emission Inventory

| Case No. | Emission Source Description                                        | EI <sup>a</sup><br>(tons/yr) | n <sup>b</sup> | Variability in Emission Factor <sup>c</sup> | Uncertainty in Emission Factor<br>(%, %) <sup>d</sup> | Rank Correlation 1 <sup>e</sup> | Rank Correlation 2 <sup>f</sup> |
|----------|--------------------------------------------------------------------|------------------------------|----------------|---------------------------------------------|-------------------------------------------------------|---------------------------------|---------------------------------|
| 1        | Mobile Source – Light Duty Gasoline Vehicles                       | 1164                         | ---            | ---                                         | (-87, 236)                                            | <b>0.91</b>                     | <b>0.67</b>                     |
| 2        | Mobile Source – Light Duty Gasoline Trucks                         | 846                          | ---            | ---                                         | (-87, 236)                                            | <b>0.91</b>                     | <b>0.51</b>                     |
| 3a       | Gasoline loading racks at bulk terminals and bulk plants           | ---                          | 3              | L (-3.62, 1.40)                             | (-89, 345)                                            | ---                             | ---                             |
| 3b       | Storage losses at a typical gasoline bulk terminal (non Winter)    | ---                          | 11             | L (-3.86, 1.44)                             | (-72, 185)                                            | ---                             | ---                             |
| 3c       | Storage losses at a typical gasoline bulk terminal (winter)        | ---                          | 11             | L (-3.53, 1.43)                             | (-71, 195)                                            | ---                             | ---                             |
| 3d       | For a typical bulk plant                                           | ---                          | 6              | L (-3.02, 1.67)                             | (-86, 342)                                            | ---                             | ---                             |
| 3e       | Storage losses at a typical pipeline breakout station (non-winter) | ---                          | 11             | L (-2.97, 1.77)                             | (-84, 226)                                            | ---                             | ---                             |
| 3f       | Storage losses at a typical pipeline breakout station (winter)     | ---                          | 11             | L (-2.64, 1.75)                             | (-82, 285)                                            | ---                             | ---                             |
| 3g       | For typical Service Station for petroleum refinery                 | ---                          | 7              | L (-3.93, 1.35)                             | (-78, 213)                                            | ---                             | ---                             |
| 3h       | Petroleum Refinery wastewater                                      | ---                          | 19             | G (0.53, 65.54)                             | (-52, 71)                                             | ---                             | ---                             |
| 3i       | Storage tank for petroleum refinery                                | ---                          | 5              | L (4.48, 2.57)                              | (-98, 562)                                            | ---                             | ---                             |
| 3        | Petroleum refinery                                                 | 714                          | ---            | ---                                         | (-55, 158)                                            | <b>0.17</b>                     | <b>0.22</b>                     |
| 4        | 4-stroke lawn and garden engines                                   | 687                          | ---            | ---                                         | (-34, 46)                                             | <b>0.13</b>                     | <b>0.14</b>                     |
| 5        | 2-stroke lawn and garden engines                                   | 234                          | ---            | ---                                         | (-32, 40)                                             | 0.057                           | 0.055                           |
| 6        | Construction, farm and industrial engine (diesel 4 Stroke)         | 142                          | ---            | ---                                         | (-26, 30)                                             | 0.023                           | 0.023                           |
| 7        | Oil and natural gas production                                     | 141                          | ---            | ---                                         | (-10, 10)                                             | 0.066                           | 0.053                           |

(Continued)

**Table S-1. Continued**

| Case No. | Emission Source Description                                                                 | EI <sup>a</sup><br>(tons/yr) | n <sup>b</sup> | Variability in Emission Factor <sup>c</sup> | Uncertainty in Emission Factor<br>(%, %) <sup>d</sup> | Rank Correlation 1 <sup>e</sup> | Rank Correlation 2 <sup>f</sup> |
|----------|---------------------------------------------------------------------------------------------|------------------------------|----------------|---------------------------------------------|-------------------------------------------------------|---------------------------------|---------------------------------|
| 8        | Storage and transport, Natural Gas Transmissions and Marine Transport                       | 100                          | ---            | ---                                         | (-10, 10)                                             | 0.066                           | -0.007                          |
| 9        | Mobile source-Heavy Duty Gasoline Vehicle                                                   | 79.0                         |                |                                             | (-87, 236)                                            | <b>0.91</b>                     | 0.057                           |
| 10       | Other combustion-forest wildfires                                                           | 54.4                         | 6              | W (1.82, 1.61)                              | (-40, 45)                                             | 0.044                           | 0.031                           |
| 11       | Solid waste disposal- sewage treatment                                                      | 49.5                         | 16             | L (0.32, 3.27)                              | (-98, 328)                                            | 0.015                           | <b>0.098</b>                    |
| 12       | Industrial Processes; Chemical Manufacturing; Acetylene production                          | 47.9                         | ---            | ---                                         | (-10, 10)                                             | 0.066                           | -0.021                          |
| 13       | Fuel oil external combustion                                                                | 45.3                         | 14<br>(11)     | G (0.28, 3.27)                              | (-68, 120)                                            | 0.051                           | 0.021                           |
| 14       | Typical ethylene plant                                                                      | 43.3                         | 8              | L (-4.18, 2.85)                             | (-99, 221)                                            | 0.015                           | 0.026                           |
| 15       | Storage and Transport; Petroleum Product Storage; Gasoline Service Stations; Stage 1: Total | 40.0                         | ---            | ---                                         | (-78, 213)                                            | 0.043                           | <b>0.12</b>                     |
| 16       | Industrial Processes; Petroleum Industry; Fugitive                                          | 38.6                         | ---            | ---                                         | (-10, 10)                                             | 0.066                           | 0.019                           |
| 17       | Other combustion-managed prescribed burning                                                 | 33.9                         | 7              | G (2.21, 0.59)                              | (-43, 53)                                             | 0.038                           | 0.076                           |
| 18-1     | Total Hydrocarbon from Heavy Duty Diesel Vehicle                                            | ---                          | 24             | L (0.46, 1.46)                              | (-58, 150)                                            |                                 |                                 |
| 18-2     | Benzene fraction in THC from Heavy Duty Diesel Vehicle                                      | ---                          | 24             | W (3.36, 0.009)                             | (-13, 13)                                             |                                 |                                 |

(Continued)

**Table S-1. Continued**

| Case No. | Emission Source Description                                                                       | EI <sup>a</sup><br>(tons/yr) | n <sup>b</sup> | Variability in Emission Factor <sup>c</sup> | Uncertainty in Emission Factor<br>(%, %) <sup>d</sup> | Rank Correlation 1 <sup>e</sup> | Rank Correlation 2 <sup>f</sup> |
|----------|---------------------------------------------------------------------------------------------------|------------------------------|----------------|---------------------------------------------|-------------------------------------------------------|---------------------------------|---------------------------------|
| 18       | Benzene emission factor from Heavy Duty Diesel Vehicle                                            | 33.9                         | ---            | ---                                         | (-59, 166)                                            | -0.028                          | 0.021                           |
| 19       | Industrial Processes; Chemical Manufacturing; Fugitive Emissions                                  | 30.5                         | ---            | ---                                         | (-10, 10)                                             | 0.066                           | -0.026                          |
| 20       | Mobile source-aircraft                                                                            | 26.2                         | ---            | ---                                         | (-51, 72)                                             | <b>0.099</b>                    | 0.086                           |
| 21       | Industrial Processes; Petroleum Industry; Fugitive Emissions; Miscellaneous: Sampling/Non-Asphalt | 26.0                         | ---            | ---                                         | (-10, 10)                                             | 0.066                           | -0.003                          |
| 22       | Petroleum refinery-process vent in refinery product                                               | 24.9                         | 13             | G (0.32, 2.37)                              | (-73, 113)                                            | -0.065                          | -0.007                          |
| 23       | Loading, ballasting and transit losses from marine vessels                                        | 21.6                         | 9              | L (-4.17, 0.54)                             | (-31, 37)                                             | <b>0.11</b>                     | <b>0.11</b>                     |
| 24       | Industrial Processes; Chemical Manufacturing; Processes; Fugitive leaks                           | 20.7                         | ---            | ---                                         | (-10, 10)                                             | 0.066                           | 0.077                           |

<sup>a</sup>. Point estimate of benzene emission inventory

<sup>b</sup>. Sample size, for censored data set, the number of non-detects is shown in parenthesis

<sup>c</sup>. Inter-unit Variability in emission factor. L: lognormal distribution; G: gamma distribution; W: Weibull distribution.

The parameters of the distribution are given in parenthesis

<sup>d</sup>. The 95 % confidence interval relative to the mean is given.

<sup>e</sup>. Rank correlation between the uncertainty in the total emissions and the uncertainty in the emission factors for each source category with correlated surrogates. Statistically significant correlations are shown in boldface.

<sup>f</sup>. Rank correlation between the uncertainty in the total emissions and the uncertainty in the emission factors for each source category with uncorrelated surrogates. Statistically significant correlations are shown in boldface.

<sup>g</sup>. Fit parametric distribution with MOMM method instead of MLE since MOMM results in a better fit judged graphically.



**Table S-2.** Quantification of Variability and Uncertainty for Formaldehyde Emission Inventory

| Case No. | Emission Source Description                                                  | EI <sup>a</sup><br>(tons/yr) | n <sup>b</sup> | Variability in Emission Factor <sup>c</sup> | Uncertainty in Emission Factor<br>(%, %) <sup>d</sup> | Rank Correlation 1 <sup>e</sup> | Rank Correlation 2 <sup>f</sup> |
|----------|------------------------------------------------------------------------------|------------------------------|----------------|---------------------------------------------|-------------------------------------------------------|---------------------------------|---------------------------------|
| 1a       | Nonroad - 4-stroke lawn and garden engines                                   | 183                          | ---            | ---                                         | (-39, 59)                                             | ---                             | ---                             |
| 1b       | Nonroad - 2-stroke lawn and garden engines                                   |                              | ---            | ---                                         | (-36, 51)                                             | ---                             | ---                             |
| 1c       | Nonroad-CFI engine (diesel 4S)                                               | 935                          | ---            | ---                                         | (-32, 43)                                             | ---                             | ---                             |
| 1d       | Nonroad-Aircraft                                                             | 164                          | ---            | ---                                         | (-53, 80)                                             | ---                             | ---                             |
| 1        | Noroad mobile source                                                         | 1282                         | ---            | ---                                         | (-26, 35)                                             | <b>0.31</b>                     | <b>0.31</b>                     |
| 2a       | Onroad gasoline                                                              | 764                          | ---            | ---                                         | (-87, 224)                                            | ---                             | ---                             |
| 2b-1     | Onroad diesel engines-THC                                                    | ---                          | 24             | L (0.46, 1.46)                              | (-58, 150)                                            | ---                             | ---                             |
| 2b-2     | Onroad diesel engines-formaldehyde fraction                                  | ---                          | 24             | W (1.43, 0.086)                             | (-28, 30)                                             | ---                             | ---                             |
| 2b       | Onroad diesel engines                                                        | 213                          | ---            | ---                                         | (-63, 166)                                            | ---                             | ---                             |
| 2        | Onroad mobile source                                                         | 977                          | ---            | ---                                         | (-75, 177)                                            | <b>0.89</b>                     | <b>0.89</b>                     |
| 3a       | Stationary reciprocating internal combustion engines (material type: liquid) | ---                          | 12             | L (-2.21, 1.58)                             | (-74, 217)                                            | ---                             | ---                             |
| 3b       | Stationary reciprocating internal combustion engines (material type: gas)    | ---                          | 12             | L (1.12, 2.59)                              | (-96, 409)                                            | ---                             | ---                             |
| 3        | Internal combustion engines                                                  | 144                          | ---            | ---                                         | (-77, 269)                                            | <b>0.14</b>                     | <b>0.14</b>                     |
| 4        | Oil and gas extraction                                                       | 99.5                         | ---            | ---                                         | (-10, 10)                                             | 0.030                           | 0.024                           |
| 5        | Chemical and allied processes                                                | 69.7                         | ---            | ---                                         | (-10, 10)                                             | 0.030                           | 0.006                           |
| 6a       | Stationary combustion turbines (material type: liquid)                       | ---                          | 3              | L (-3.18, 0.38)                             | (-36, 50)                                             | ---                             | ---                             |
| 6b       | Stationary combustion turbines (material type: gas)                          | ---                          | 10             | L (-0.12, 0.98)                             | (-55, 100)                                            | ---                             | ---                             |

(Continued)

**Table S-2. Continued**

| Case No. | Emission Source Description          | EI <sup>a</sup><br>(tons/yr) | n <sup>b</sup> | Variability in Emission Factor <sup>c</sup> | Uncertainty in Emission Factor<br>(%, %) <sup>d</sup> | Rank Correlation 1 <sup>e</sup> | Rank Correlation 2 <sup>f</sup> |
|----------|--------------------------------------|------------------------------|----------------|---------------------------------------------|-------------------------------------------------------|---------------------------------|---------------------------------|
| 6        | Combustion turbines                  | 66.6                         |                |                                             | (-36, 56)                                             | 0.072                           | 0.071                           |
| 7        | Petroleum refineries                 | 64.1                         | 3              | L (0.057, 0.58)                             | (-51, 93)                                             | <b>0.099</b>                    | <b>0.097</b>                    |
| 8        | Open burning, forest and wildfires   | 39.9                         | ---            | ---                                         | ---                                                   | ---                             | ---                             |
| 9        | Open burning, prescribed burnings    | 24.7                         | ---            | ---                                         | ---                                                   | ---                             | ---                             |
| 10       | Utility boilers                      | 7.59                         | ---            | ---                                         | (-55, 152)                                            | 0.086                           | 0.083                           |
| 11a      | External combustion- coal combustion | ---                          | 14<br>(5)      | L (-0.59, 1.44)                             | (-77, 208)                                            | ---                             | ---                             |
| 11b      | External combustion-wood fired waste | ---                          | 20             | L (1.11, 1.34)                              | (-58, 129)                                            | ---                             | ---                             |
| 11c      | External combustion-fuel oil         | ---                          | 14<br>(9)      | W (0.24, 1.42)                              | (-94, 368)                                            | ---                             | ---                             |
| 11       | Industrial boilers                   | 5.06                         | ---            | ---                                         | (-55, 152)                                            | 0.086                           | 0.041                           |
| 12       | Structure fires                      | 4.78                         | ---            | ---                                         | ---                                                   | ---                             | ---                             |

<sup>a</sup>. Point estimate of formaldehyde emission inventory

<sup>b</sup>. Sample size, for censored data set, the number of non-detects is shown in parenthesis

<sup>c</sup>. Variability in emission factor. L: lognormal distribution; G: gamma distribution; W: Weibull distribution.  
The parameters of the distribution are given in parenthesis

<sup>d</sup>. The 95 % confidence interval relative to the mean is given.

<sup>e</sup>. Rank correlation between the uncertainty in the total emissions and the uncertainty in the emission factors for each source category with correlated surrogates. Statistically significant correlations are shown in boldface

<sup>f</sup>. Rank correlation between the uncertainty in the total emissions and the uncertainty in the emission factors for each source category with uncorrelated surrogates. Statistically significant correlations are shown in boldface.

**Table S-3.** Quantification of Variability and Uncertainty for Chromium Emission Inventory

| Case No. | Emission Source Description                                      | EI <sup>a</sup><br>(tons/yr) | n <sup>b</sup> | Variability<br>in Emission<br>Factor <sup>c</sup> | Uncertainty<br>in Emission<br>Factor<br>(%, %) <sup>d</sup> | Rank<br>Correlation<br>1 <sup>e</sup> | Rank<br>Correlation<br>2 <sup>f</sup> |
|----------|------------------------------------------------------------------|------------------------------|----------------|---------------------------------------------------|-------------------------------------------------------------|---------------------------------------|---------------------------------------|
| 1        | Petroleum Refineries - Catalytic Cracking                        | 1.87                         | 3              | W (121.8, 5.01)                                   | (-1.5, 1.0)                                                 | <b>0.092</b>                          | <b>0.090</b>                          |
| 2        | External Combustion Boilers-Utilities-Coal                       | 1.12                         | 28<br>(1)      | L (-0.13, 1.51)                                   | (-59, 123)                                                  | <b>0.58</b>                           | <b>0.61</b>                           |
| 3        | Marine Vessels, Commercial                                       | 1.03                         |                |                                                   |                                                             |                                       |                                       |
| 4        | Chemical Manufacturing-Fuel Fired Equipment-Process Heaters      | 0.81                         | 3              | L (-2.24, 1.02)                                   | (-79, 211)                                                  | <b>0.65</b>                           | <b>0.66</b>                           |
| 5        | All Off-highway Vehicle: Diesel                                  | 0.34                         |                |                                                   |                                                             |                                       |                                       |
| 6        | Hazardous Waste Incineration                                     | 0.28                         | 48             | L (1.80, 0.84)                                    | (-26, 32)                                                   | <b>0.12</b>                           | <b>0.11</b>                           |
| 7        | Hard Chromium Electroplating                                     | 0.23                         | 12             | W (0.58, 0.48)                                    | (-71, 137)                                                  | <b>0.36</b>                           | <b>0.21</b>                           |
| 8        | Organic Solvent Evaporation-Surface Coating-General              | 0.18                         | 10             | L (1.39, 1.13)                                    | (-60, 130)                                                  | 0.059                                 | 0.076                                 |
| 9        | Chromium Metal Plating                                           | 0.16                         |                |                                                   | (-71, 137)                                                  | <b>0.36</b>                           | 0.057                                 |
| 10       | Fabricated Plate Work (Boiler Shops)                             | 0.12                         |                |                                                   |                                                             |                                       |                                       |
| 11       | Nonclay Refractories (Not Subject To Refractories Manufacturing) | 0.12                         |                |                                                   |                                                             |                                       |                                       |
| 12a      | Fuel Oil                                                         |                              | 13<br>(1)      | L (1.91, 0.69)                                    | (-32, 36)                                                   |                                       |                                       |
| 12b      | Refinery gas and landfill gas                                    |                              | 3              | W (1.86, 2.48)                                    | (-59, 69)                                                   |                                       |                                       |
| 12       | Oil and Gas Field Machinery Manufacturing                        | 0.12                         |                |                                                   | (-33, 34)                                                   | <b>0.099</b>                          | <b>0.10</b>                           |

(Continued)

**Table S-3. Continued**

| Case No. | Emission Source Description                                    | EI <sup>a</sup><br>(tons/yr) | n <sup>b</sup> | Variability<br>in Emission<br>Factor <sup>c</sup> | Uncertainty<br>in Emission<br>Factor<br>(%, %) <sup>d</sup> | Rank<br>Correlation<br>1 <sup>e</sup> | Rank<br>Correlation<br>2 <sup>f</sup> |
|----------|----------------------------------------------------------------|------------------------------|----------------|---------------------------------------------------|-------------------------------------------------------------|---------------------------------------|---------------------------------------|
| 13       | Light Duty Gasoline Vehicles<br>(LDGV)                         | 0.11                         |                |                                                   |                                                             |                                       |                                       |
| 14       | Secondary Metal Production-Steel<br>Foundries                  | 0.057                        | 12             | L (-0.21,<br>1.10)                                | (-55, 110)                                                  | -0.074                                | -0.056                                |
| 15       | Asphalt Roofing: Dipping Only                                  | 0.053                        | 5              | L (1.83,<br>1.72)                                 | (-91, 424)                                                  | <b>0.12</b>                           | <b>0.20</b>                           |
| 16       | Light Duty Gasoline Trucks 1 & 2<br>(LDGT)                     | 0.046                        |                |                                                   |                                                             |                                       |                                       |
| 17       | Portland Cement Manufacturing                                  | 0.042                        |                |                                                   |                                                             |                                       |                                       |
| 18       | Manufacturing-Vinyl Acetate                                    | 0.030                        |                |                                                   |                                                             |                                       |                                       |
| 19       | Residential Heating: Wood/Wood<br>Residue                      | 0.030                        | 8              | W (1.46,<br>0.86)                                 | (-62, 108)                                                  | -0.043                                | -0.047                                |
| 20       | All Off-highway Vehicle: Gasoline, 2-<br>Stroke                | 0.025                        |                |                                                   |                                                             |                                       |                                       |
| 21       | All Off-highway Vehicle: Gasoline, 4-<br>Stroke                | 0.024                        |                |                                                   |                                                             |                                       |                                       |
| 22       | Primary Metal Production-Steel<br>Production                   | 0.023                        | 3              | L (0.74,<br>0.55)                                 | (-49, 75)                                                   | -0.085                                | -0.079                                |
| 23       | Residential Heating: Distillate Oil                            | 0.016                        |                |                                                   |                                                             |                                       |                                       |
| 24       | External Combustion Boilers-<br>Commercial/Institution-Liquate | 0.015                        |                |                                                   |                                                             |                                       |                                       |
| 25       | Institutional/Commercial Heating:<br>Distillate Oil            | 0.011                        |                |                                                   |                                                             |                                       |                                       |

(Continued)

**Table S-3. Continued**

| Case No. | Emission Source Description       | EI <sup>a</sup><br>(tons/yr) | n <sup>b</sup> | Variability<br>in Emission<br>Factor <sup>c</sup> | Uncertainty<br>in Emission<br>Factor<br>(%, %) <sup>d</sup> | Rank<br>Correlation<br>1 <sup>e</sup> | Rank<br>Correlation<br>2 <sup>f</sup> |
|----------|-----------------------------------|------------------------------|----------------|---------------------------------------------------|-------------------------------------------------------------|---------------------------------------|---------------------------------------|
| 26       | Industrial Boilers: Residual Oil  | 0.011                        | 13<br>(1)      | L (1.91,<br>0.70)                                 | (-32, 36)                                                   | 0.051                                 | -0.016                                |
| 27       | Pulp/Paper Industry-Kraft Pulping | 0.010                        |                |                                                   |                                                             |                                       |                                       |

<sup>a</sup>. Point estimate of formaldehyde emission inventory

<sup>b</sup>. Sample size, for censored data set, the number of non-detects is shown in parenthesis

<sup>c</sup>. Variability in emission factor. L: lognormal distribution; G: gamma distribution; W: Weibull distribution.

The parameters of the distribution are given in parenthesis

<sup>d</sup>. The 95 % confidence interval relative to the mean is given.

<sup>e</sup>. Rank correlation between the uncertainty in the total emissions and the uncertainty in the emission factors for each source category with correlated surrogates. Statistically significant correlations are shown in boldface

<sup>f</sup>. Rank correlation between the uncertainty in the total emissions and the uncertainty in the emission factors for each source category with uncorrelated surrogates. Statistically significant correlations are shown in boldface.

**Table S-4.** Quantification of Variability and Uncertainty for Arsenic Emission Inventory

| Case No. | Emission Source Description                              | EI <sup>a</sup><br>(tons/yr) | n <sup>b</sup> | Variability in Emission Factor <sup>c</sup> | Uncertainty in Emission Factor<br>(%, %) <sup>d</sup> | Rank Correlation 1 <sup>e</sup> | Rank Correlation 2 <sup>f</sup> |
|----------|----------------------------------------------------------|------------------------------|----------------|---------------------------------------------|-------------------------------------------------------|---------------------------------|---------------------------------|
| 1        | External Combustion Boilers-Utilities-Coal               | 1.77                         | 29<br>(3)      | L (-1.28, 2.34)                             | (-91, 264)                                            | <b>0.99</b>                     | <b>0.99</b>                     |
| 2        | Hazardous Waste Incineration                             | 0.35                         | 45             | L (0.63, 1.09)                              | (-33, 52)                                             | <b>0.11</b>                     | <b>0.10</b>                     |
| 3        | Portland Cement Manufacturing                            | 0.24                         |                |                                             |                                                       |                                 |                                 |
| 4        | Petroleum Refineries - Catalytic Cracking                | 0.21                         |                |                                             |                                                       |                                 |                                 |
| 5        | Marine Vessels, Commercial                               | 0.20                         |                |                                             |                                                       |                                 |                                 |
| 6        | Pulp/Paper Industry-Kraft Pulping                        | 0.039                        |                |                                             |                                                       |                                 |                                 |
| 7        | Residential Heating: Distillate Oil                      | 0.028                        | 3              | W (2.63, 2.28)                              | (-51, 92)                                             | -0.043                          | -0.049                          |
| 8        | Residential Heating: Wood/Wood Residue                   | 0.015                        |                |                                             | (-71, 71)                                             | -0.046                          | -0.008                          |
| 9        | Industrial Boilers: Residual Oil                         | 0.014                        | 13<br>(3)      | W (1.03, 1.07)                              | (-46, 59)                                             | <b>0.10</b>                     | <b>0.095</b>                    |
| 10       | Institutional/Commercial Heating: Distillate Oil         | 0.012                        |                |                                             | (-51, 92)                                             | -0.043                          | -0.086                          |
| 11       | Institutional/Commercial Heating: Residual Oil           | 0.011                        |                |                                             | (-46, 59)                                             | <b>0.10</b>                     | -0.003                          |
| 12       | Institutional/Commercial Heating: Bituminous and Lignite | 0.008                        |                |                                             | (-91, 264)                                            | <b>0.99</b>                     | 0.022                           |
| 13       | Wood Preserving                                          | 0.005                        |                |                                             |                                                       |                                 |                                 |

(Continued)

**Table S-4.** Continued.

| Case No. | Emission Source Description                         | EI <sup>a</sup><br>(tons/yr) | n <sup>b</sup> | Variability in Emission Factor <sup>c</sup> | Uncertainty in Emission Factor<br>(%, %) <sup>d</sup> | Rank Correlation 1 <sup>e</sup> | Rank Correlation 2 <sup>f</sup> |
|----------|-----------------------------------------------------|------------------------------|----------------|---------------------------------------------|-------------------------------------------------------|---------------------------------|---------------------------------|
| 14       | External Combustion Boilers-Industrial Wood         | 0.0050                       | 7<br>(2)       | W (0.59, 0.61)                              | (-71, 71)                                             | -0.045                          | -0.053                          |
| 15       | Residential Heating: Bituminous and Lignite Coal    | 0.0044                       |                |                                             | (-91, 264)                                            | <b>0.99</b>                     | 0.012                           |
| 16       | Manufacturing-Inorganic Chemicals-General Processes | 0.0034                       |                |                                             |                                                       |                                 |                                 |
| 17       | Primary Nonferrous Metals Production                | 0.0030                       |                |                                             |                                                       |                                 |                                 |
| 18       | Industrial Boilers: Wood/Wood Residue               | 0.0027                       | 7<br>(2)       | W (0.59, 0.61)                              | (-71, 71)                                             | 0.058                           | 0.058                           |
| 19       | Industrial Boilers: Waste Oil                       | 0.0022                       |                |                                             | (-46, 59)                                             | <b>0.10</b>                     | 0.022                           |
| 20       | Food and Agricultural Products: Cotton Ginning      | 0.0021                       |                |                                             |                                                       |                                 |                                 |

<sup>a</sup>. Point estimate of formaldehyde emission inventory

<sup>b</sup>. Sample size, for censored data set, the number of non-detects is shown in parenthesis

<sup>c</sup>. Variability in emission factor. L: lognormal distribution; G: gamma distribution; W: Weibull distribution. The parameters of the distribution are given in parenthesis

<sup>d</sup>. The 95 % confidence interval relative to the mean is given.

<sup>e</sup>. Rank correlation between the uncertainty in the total emissions and the uncertainty in the emission factors for each source category with correlated surrogates. Statistically significant correlations are shown in boldface

<sup>f</sup>. Rank correlation between the uncertainty in the total emissions and the uncertainty in the emission factors for each source category with uncorrelated surrogates. Statistically significant correlations are shown in boldface.

**Table S-5.** Data and Data Source for Benzene Emission Factors

| Case No. | Emission Source Description                                                  | Data Status <sup>a</sup> | Data Source                                                                      | 95% PR of variability <sup>b</sup> |
|----------|------------------------------------------------------------------------------|--------------------------|----------------------------------------------------------------------------------|------------------------------------|
| 1        | Mobile Source – LDGV                                                         | D                        | References: 5 & 39                                                               |                                    |
| 2        | Mobile Source – LDGT                                                         | S                        | Surrogate: Case 1                                                                |                                    |
| 3a       | Gasoline loading racks at bulk terminals and bulk plants                     | D                        | References: 35 & 36                                                              | $2.3 \times 10^2$                  |
| 3b       | Storage losses at a typical gasoline bulk terminal (non Winter)              | D                        |                                                                                  | $2.6 \times 10^2$                  |
| 3c       | Storage losses at a typical gasoline bulk terminal (winter)                  | D                        |                                                                                  | $2.8 \times 10^2$                  |
| 3d       | For a typical bulk plant                                                     | D                        |                                                                                  | $8.9 \times 10^2$                  |
| 3e       | Storage losses at a typical pipeline breakout station (non-winter)           | D                        |                                                                                  | $6.8 \times 10^2$                  |
| 3f       | Storage losses at a typical pipeline breakout station (winter)               | D                        |                                                                                  | $7.1 \times 10^2$                  |
| 3g       | For typical Service Station for petroleum refinery                           | D                        |                                                                                  | $1.7 \times 10^2$                  |
| 3h       | Petroleum Refinery wastewater                                                | D                        |                                                                                  | $3.6 \times 10^3$                  |
| 3i       | Storage tank for petroleum refinery                                          | D                        |                                                                                  | $2.5 \times 10^4$                  |
| 3        | Weighted average from 3a to 3i                                               | D                        |                                                                                  |                                    |
| 4        | 4-stroke lawn and garden engines                                             | D/S                      | References: 7 & 39                                                               |                                    |
| 5        | 2-stroke lawn and garden engines                                             | D/S                      | References: 7 & 39                                                               |                                    |
| 6        | Construction, farm and industrial engine (diesel 4S)                         | D/S                      | References: 8 & 37                                                               |                                    |
| 7        | Oil and natural gas production                                               | S                        | Surrogate: methane fugitive emissions from gas and oil industry<br>Reference: 38 |                                    |
| 8        | Storage and transport, Natural Gas Transmissions and Marine Transport        | S                        | Surrogate: methane fugitive emissions from gas and oil industry<br>Reference: 38 |                                    |
| 9        | Mobile source-HDGV                                                           | S                        | Surrogate: Case 1                                                                |                                    |
| 10       | Other combustion-forest wildfires                                            | D                        | Reference: 35                                                                    | 15                                 |
| 11       | Solid waste disposal- sewage treatment                                       | D                        | Reference: 35                                                                    | $1.9 \times 10^5$                  |
| 12       | Industrial Processes; Chemical Manufacturing; Acetylene production           | S                        | Reference: 38                                                                    |                                    |
| 13       | Fuel oil external combustion                                                 | D                        | Reference: 33                                                                    | $2.7 \times 10^6$                  |
| 14       | Typical ethylene plant                                                       | D                        | Reference: 35                                                                    | $5.1 \times 10^4$                  |
| 15       | Storage and Transport; Petroleum Product Storage; Gasoline Service Stations; | D                        | Reference: 35                                                                    |                                    |

(Continued)



**Table S-5.** Continued.

| Case No. | Emission Source Description                                                                       | Data Status <sup>a</sup> | Data Source                                                                      | 95% PR of variability <sup>b</sup> |
|----------|---------------------------------------------------------------------------------------------------|--------------------------|----------------------------------------------------------------------------------|------------------------------------|
| 16       | Industrial Processes; Petroleum Industry; Fugitive                                                | S                        | Surrogate: methane fugitive emissions from gas and oil industry<br>Reference: 38 |                                    |
| 17       | Other combustion-managed prescribed burning                                                       | D                        | Reference: 35                                                                    | 20                                 |
| 18-1     | THC from HDDV                                                                                     | D                        | Reference: 37                                                                    | $2.8 \times 10^{-2}$               |
| 18-2     | Benzene fraction in THC from HDDV                                                                 | D                        | Reference: 37                                                                    | 5                                  |
| 18       | Benzene emission factor from HDDV                                                                 | D                        | Reference: 37                                                                    |                                    |
| 19       | Industrial Processes; Chemical Manufacturing; Fugitive Emissions                                  | S                        | Surrogate: methane fugitive emissions from gas and oil industry<br>Reference: 38 |                                    |
| 20       | Mobile source-aircraft                                                                            | D/S                      | Reference: 39                                                                    |                                    |
| 21       | Industrial Processes; Petroleum Industry; Fugitive Emissions; Miscellaneous: Sampling/Non-Asphalt | S                        | Surrogate: methane fugitive emissions from gas and oil industry<br>Reference: 38 |                                    |
| 22       | Petroleum refinery-process vent in refinery product                                               | D                        | Reference: 37                                                                    | $1.9 \times 10^{-5}$               |
| 23       | Loading, ballasting and transit losses from marine vessels                                        | D                        | Reference: 37                                                                    | 8.1                                |
| 24       | Industrial Processes; Chemical Manufacturing; Processes; Fugitive leaks                           | S                        | Reference: 38                                                                    |                                    |

<sup>a</sup> D = directly relevant data; S = surrogate data; D/S = Directly relevant data for THC, surrogate data for % of TOG (or THC) emitted as benzene.

<sup>b</sup> 95% probability ratio of the inter-unit variability calculated from the preferred distribution. It is the ratio of the upper level of the 95% probability range divided by the lower level. It is given only for cases which have empirical emission factor data.

**Table S-6.** Data and Data Source for Formaldehyde Emission Factors

| Case No. | Emission Source Description                                                  | Data Status <sup>a</sup> | Data Source                                                                      | 95% PR of variability <sup>b</sup> |
|----------|------------------------------------------------------------------------------|--------------------------|----------------------------------------------------------------------------------|------------------------------------|
| 1a       | Nonroad - 4-stroke lawn and garden engines                                   | D/S                      | Reference: 7 & 39                                                                |                                    |
| 1b       | Nonroad - 2-stroke lawn and garden engines                                   | D/S                      | Reference: 7 & 39                                                                |                                    |
| 1c       | Nonroad-CFI engine (diesel 4S)                                               | D/S                      | Reference: 8 & 37                                                                |                                    |
| 1d       | Nonroad-Aircraft                                                             | D/S                      | Reference: 39                                                                    |                                    |
| 1        | Nonroad                                                                      | D/S                      | Reference: 7, 8, 37 and 39                                                       |                                    |
| 2a       | Onroad gasoline                                                              | D&S <sup>c</sup>         | Reference: 7 & 39                                                                |                                    |
| 2b-1     | Onroad diesel engines-THC                                                    | D                        | Reference: 37                                                                    | $2.8 \times 10^2$                  |
| 2b-2     | Onroad diesel engines-formaldehyde fraction                                  | D                        | Reference: 37                                                                    | 37                                 |
| 2b       | Onroad diesel engines                                                        | D                        | Reference: 37                                                                    |                                    |
| 2        | Onroad                                                                       | D                        | Reference: 7, 37 and 39                                                          |                                    |
| 3a       | Stationary reciprocating internal combustion engines (material type: liquid) | D                        | Reference: 36                                                                    | $4.7 \times 10^2$                  |
| 3b       | Stationary reciprocating internal combustion engines (material type: gas)    | D                        | Reference: 36                                                                    | $2.7 \times 10^4$                  |
| 3        | Internal combustion engines                                                  | D                        | Reference: 36                                                                    |                                    |
| 4        | Oil and gas extraction                                                       | S                        | Surrogate: methane fugitive emissions from gas and oil industry<br>Reference: 38 |                                    |
| 5        | Chemical and allied processes                                                | S                        | Surrogate: methane fugitive emissions from gas and oil industry<br>Reference: 38 |                                    |
| 6a       | Stationary combustion turbines (material type: liquid)                       | D                        | Reference: 36                                                                    | 4                                  |
| 6b       | Stationary combustion turbines (material type: gas)                          | D                        | Reference: 36                                                                    | 41                                 |
| 6        | Weighted average of 6a and 6b                                                | D                        | Reference: 36                                                                    |                                    |
| 7        | Petroleum refineries                                                         | D                        | Reference: 31                                                                    | 9                                  |
| 8        | Open burning, forest and wildfires                                           | ---                      | ---                                                                              |                                    |
| 9        | Open burning, prescribed burnings                                            | ---                      | ---                                                                              |                                    |
| 10       | Utility boilers                                                              | S                        | Surrogate: Case 11                                                               |                                    |
| 11a      | External combustion- coal combustion                                         | D                        | Reference: 32                                                                    | $2.5 \times 10^2$                  |

(Continued)

**Table S-6.** Continued.

| Case No. | Emission Source Description          | Data Status <sup>a</sup> | Data Source              | 95% PR of variability <sup>b</sup> |
|----------|--------------------------------------|--------------------------|--------------------------|------------------------------------|
| 11b      | External combustion-wood fired waste | D                        | Reference: 34            | $1.8 \times 10^2$                  |
| 11c      | External combustion-fuel oil         | D                        | Reference: 33            | $2.4 \times 10^9$                  |
| 11       | Industry boilers                     | D                        | Reference: 32, 33 and 34 |                                    |
| 12       | Structure fires                      | ---                      | ---                      |                                    |

<sup>a</sup> D = directly relevant data; S = surrogate data; D/S = Directly relevant data for THC, surrogate data for % of TOG (or THC) emitted as formaldehyde.

<sup>b</sup> 95% probability range of the inter-unit variability calculated from the preferred distribution. It is the ratio of the upper level of the 95% probability range divided by the lower level. It is given only for cases which have empirical emission factor data.

<sup>c</sup> Gasoline engines include light duty gasoline vehicles and others, such as light duty gasoline trucks. The data is for light duty gasoline vehicles. Therefore, the uncertainty in the emission factors from light duty gasoline vehicles is taken as the surrogate of uncertainty in the emission factors from other types of gasoline engines onroad mobile source.

**Table S-7. Data and Data Source for Chromium Emission Factors**

| Case No. | Emission Source Description                                      | Data Status <sup>a</sup> | Data Source                                       | 95% PR of variability <sup>b</sup> |
|----------|------------------------------------------------------------------|--------------------------|---------------------------------------------------|------------------------------------|
| 1        | Petroleum Refineries - Catalytic Cracking                        | D                        | Reference: 36                                     | 1.04                               |
| 2        | External combustion boilers-Utilities-Coal                       | S                        | Surrogate:<br>industrial boilers<br>Reference: 32 | $3.9 \times 10^2$                  |
| 3        | Marine Vessels, Commercial                                       |                          |                                                   |                                    |
| 4        | Chemical Manufacturing-Fuel Fired Equipment-Process Heaters      | D                        | Reference: 41                                     | 53                                 |
| 5        | All Off-highway Vehicle: Diesel                                  |                          |                                                   |                                    |
| 6        | Hazardous Waste Incineration                                     | D                        | Reference: 40                                     | 25                                 |
| 7        | Hard Chromium Electroplating                                     | D                        | Reference: 36                                     | $4.8 \times 10^3$                  |
| 8        | Original Solvent Evaporation-Surface Coating-General             | D                        | Reference: 36                                     | 70                                 |
| 9        | Chromium Metal Plating                                           | S                        | Surrogate: Case7                                  |                                    |
| 10       | Fabricated Plate Work (Boiler Shops)                             |                          |                                                   |                                    |
| 11       | Nonclay Refractories (Not Subject to Refractories Manufacturing) |                          |                                                   |                                    |
| 12a      | Fuel Oil                                                         |                          | Reference: 33                                     | 14                                 |
| 12b      | Refinery gas and landfill gas                                    |                          | Reference: 36                                     | 15                                 |
| 12       | Oil and Gas Field Machinery Manufacturing                        | S                        | Reference: 33 and 36                              |                                    |
| 13       | Light Duty Gasoline Vehicles (LDGV)                              |                          |                                                   |                                    |
| 14       | Secondary Metal Production-Steel Foundries                       | D                        | Reference: 36                                     | 71                                 |
| 15       | ASPHALT ROOFING: DIPPING ONLY                                    | S                        | Surrogate: asphalt concrete<br>Reference: 36      | $8.7 \times 10^2$                  |
| 16       | Light Duty Gasoline Trucks 1 & 2 (LDGT)                          |                          |                                                   |                                    |
| 17       | Portland Cement Manufacturing                                    |                          |                                                   |                                    |
| 18       | Manufacturing-Vinyl Acetate                                      |                          |                                                   |                                    |
| 19       | Residential Heating: Wood/Wood Residue                           | S                        | Surrogate: boilers<br>Reference: 34               | 31                                 |
| 20       | All Off-highway Vehicle: Gasoline, 2-Stroke                      |                          |                                                   |                                    |
| 21       | All Off-highway Vehicle: Gasoline, 4-Stroke                      |                          |                                                   |                                    |

(Continued)

**Table S-7.** Continued.

| Case No. | Emission Source Description                                | Data Status <sup>a</sup> | Data Source   | 95% PR of variability <sup>b</sup> |
|----------|------------------------------------------------------------|--------------------------|---------------|------------------------------------|
| 22       | Primary Metal Production-Steel Production                  | D                        | Reference: 36 | 8                                  |
| 23       | Residential Heating: Distillate Oil                        |                          |               |                                    |
| 24       | External Combustion Boilers-Commercial/Institution-Liquate |                          |               |                                    |
| 25       | Institutional/Commercial Heating: Distillate Oil           |                          |               |                                    |
| 26       | Industrial Boilers: Residual Oil                           | D                        | Reference: 33 | 14                                 |
| 27       | Pulp/Paper Industry-Kraft Pulping                          |                          |               |                                    |

<sup>a</sup> D = directly relevant data; S = surrogate data.

<sup>b</sup> 95% probability range of the inter-unit variability calculated from the preferred distribution. It is the ratio of the upper level of the 95% probability range divided by the lower level. It is given only for cases which have empirical emission factor data.

**Table S-8.** Data and Data Source for Arsenic Emission Factors

| Case No. | Emission Source Description                              | Data Status <sup>a</sup> | Data Source                                        | 95% PR of variability <sup>b</sup> |
|----------|----------------------------------------------------------|--------------------------|----------------------------------------------------|------------------------------------|
| 1        | External Combustion Boilers-Utilities-Coal               | D                        | Reference: 32                                      | $8.7 \times 10^3$                  |
| 2        | Hazardous Waste Incineration                             | D                        | Reference: 40                                      | 73                                 |
| 3        | Portland Cement Manufacturing                            |                          |                                                    |                                    |
| 4        | Petroleum Refineries - Catalytic Cracking                |                          |                                                    |                                    |
| 5        | Marine Vessels, Commercial                               |                          |                                                    |                                    |
| 6        | Pulp/Paper Industrial-Kraft Pulping                      |                          |                                                    |                                    |
| 7        | Residential Heating: Distillate Oil                      | S                        | Surrogate: distillate oil turbine<br>Reference: 36 | 7                                  |
| 8        | Residential Heating: Wood/Wood Residue                   | S                        | Surrogate: Case 14                                 |                                    |
| 9        | Industrial Boilers: Residual Oil                         | D                        | Reference: 33                                      | $1.2 \times 10^2$                  |
| 10       | Institutional/Commercial Heating: Distillate Oil         | S                        | Surrogate: Case 7<br>Reference: 36                 |                                    |
| 11       | Institutional/Commercial Heating: Residual Oil           | S                        | Surrogate: Case 9                                  |                                    |
| 12       | Institutional/Commercial Heating: Bituminous and Lignite | S                        | Surrogate: Case 1                                  |                                    |
| 13       | Wood Preserving                                          |                          |                                                    |                                    |
| 14       | External Combustion Boilers-Industrial-Wood              | D                        | Reference: 34                                      | $3 \times 10^3$                    |
| 15       | Residential Heating: Bituminous and Lignite Coal         | S                        | Surrogate: Case 1                                  |                                    |
| 16       | Manufacturing Inorganic Chemicals-General Process        |                          |                                                    |                                    |
| 17       | Primary Nonferrous Metals Production                     |                          |                                                    |                                    |
| 18       | Industrial Boilers: Wood/Wood Residue (area source)      | D                        | Reference: 34                                      | $3 \times 10^3$                    |
| 19       | Industrial Boilers: Waste Oil                            | S                        | Surrogate: Case 9                                  |                                    |
| 20       | Food and Agricultural Products: Cotton Ginning           |                          |                                                    |                                    |

<sup>a</sup> D = directly relevant data; S = surrogate data.

<sup>b</sup> 95% probability range of the inter-unit variability calculated from the preferred distribution. It is the ratio of the upper level of the 95% probability range divided by the lower level. It is given only for cases which have empirical emission factor data.

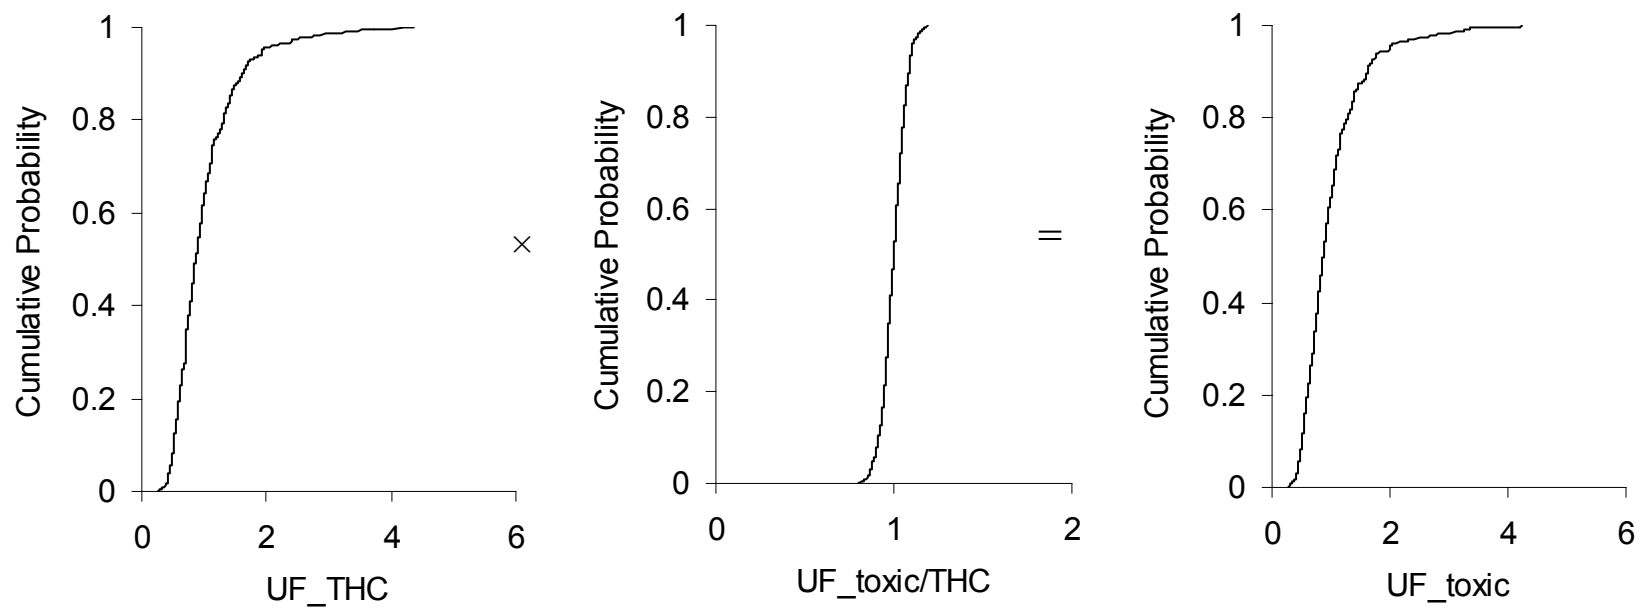

**Figure S-1.** Quantification of Uncertainty in the Mean of the Benzene Emissions Factor for Onroad Diesel Mobile Sources

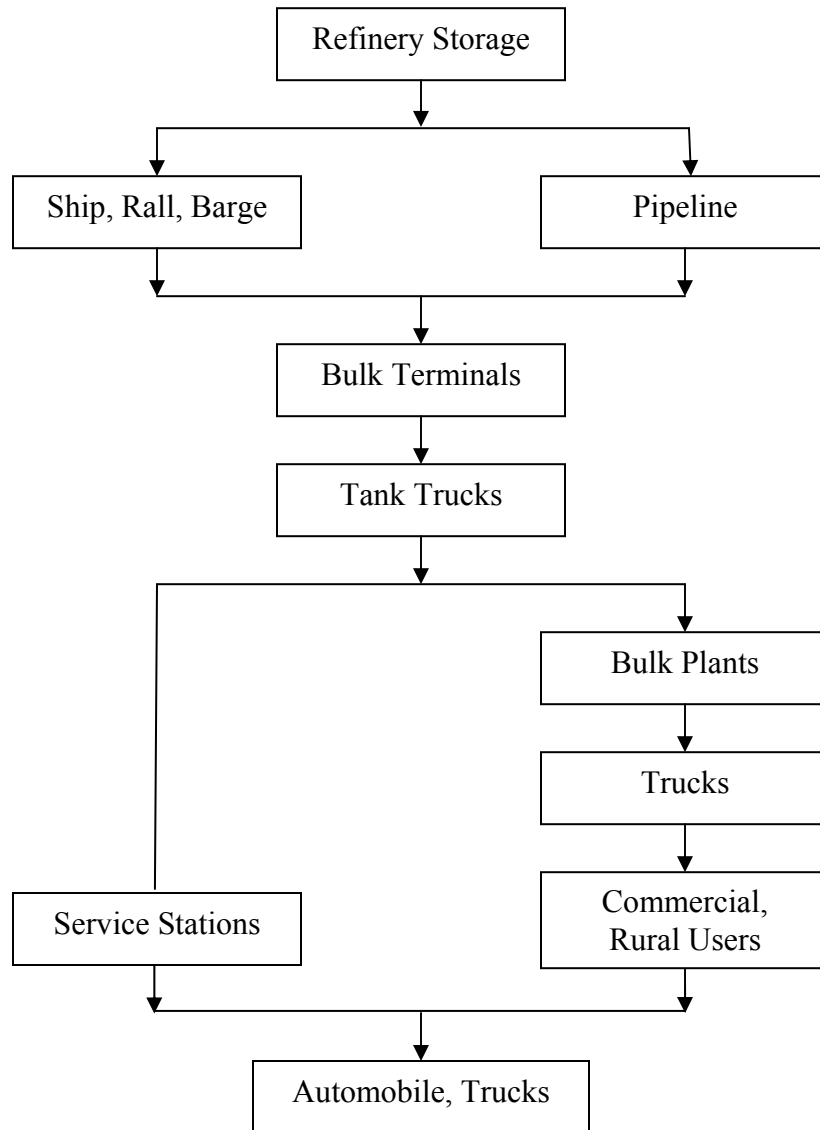

**Figure S-2.** The Gasoline Marketing Distribution System in the United States



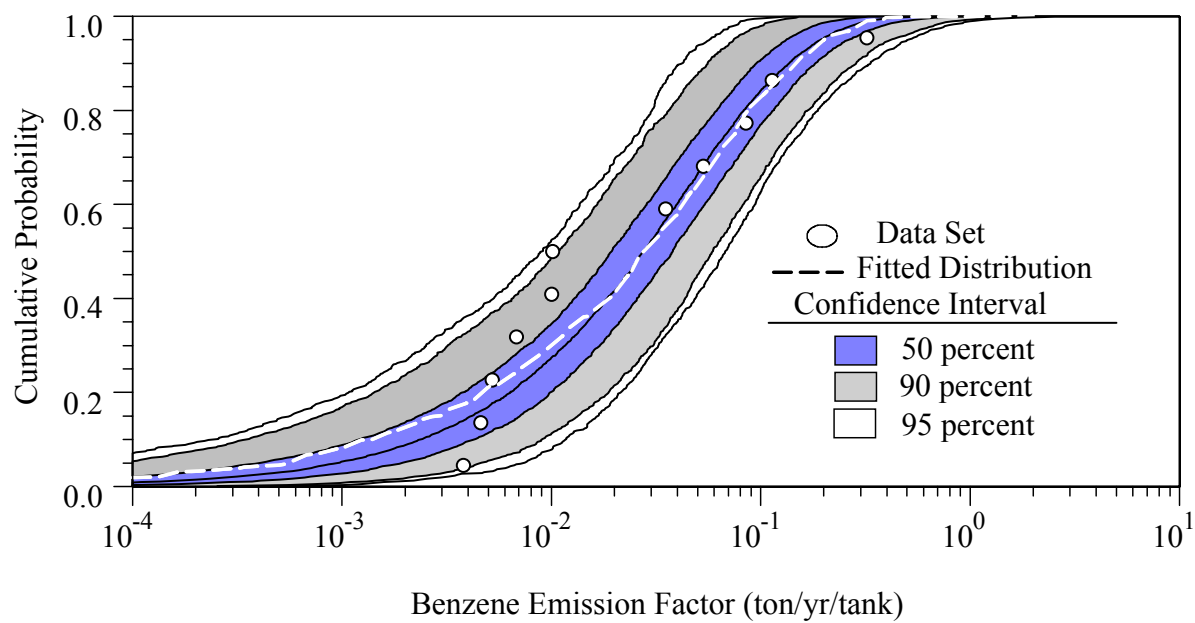

**Figure S-3.** Variability and Uncertainty in Benzene Emission Factor for Case 3b (Non-winter Storage Losses at a Typical Gasoline Bulk Terminal) Estimated Based Upon a Weibull Distribution

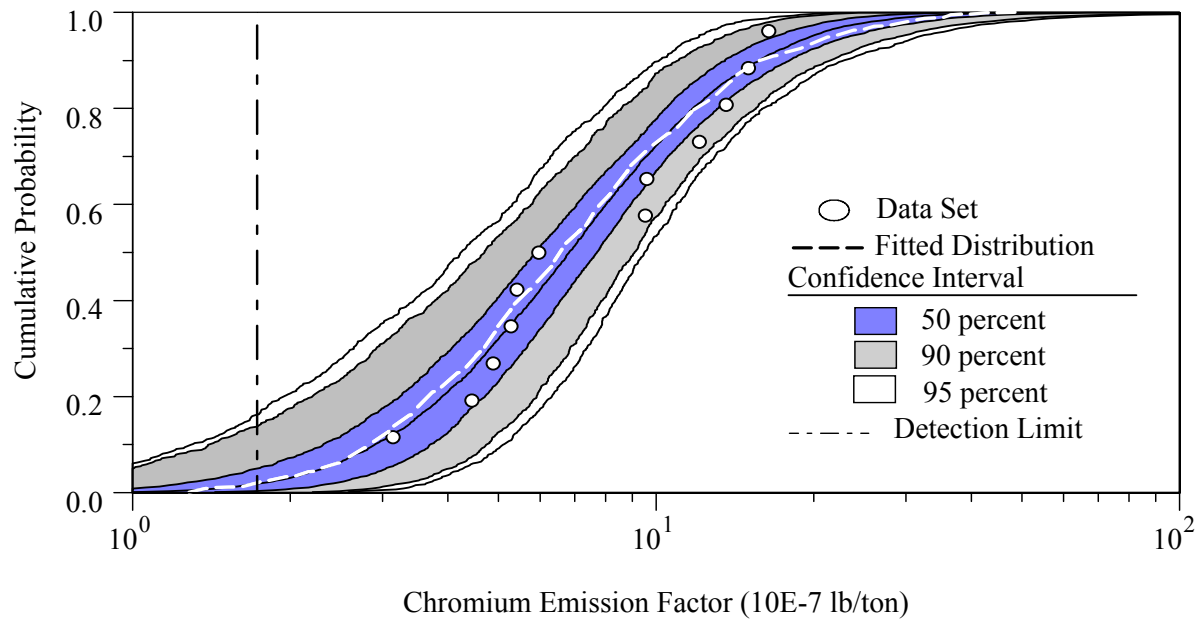

**Figure S-4.** Variability and Uncertainty in Chromium Emission Factor for Case 26 (Industrial boilers: residual oil) Estimated Based Upon a Lognormal Distribution

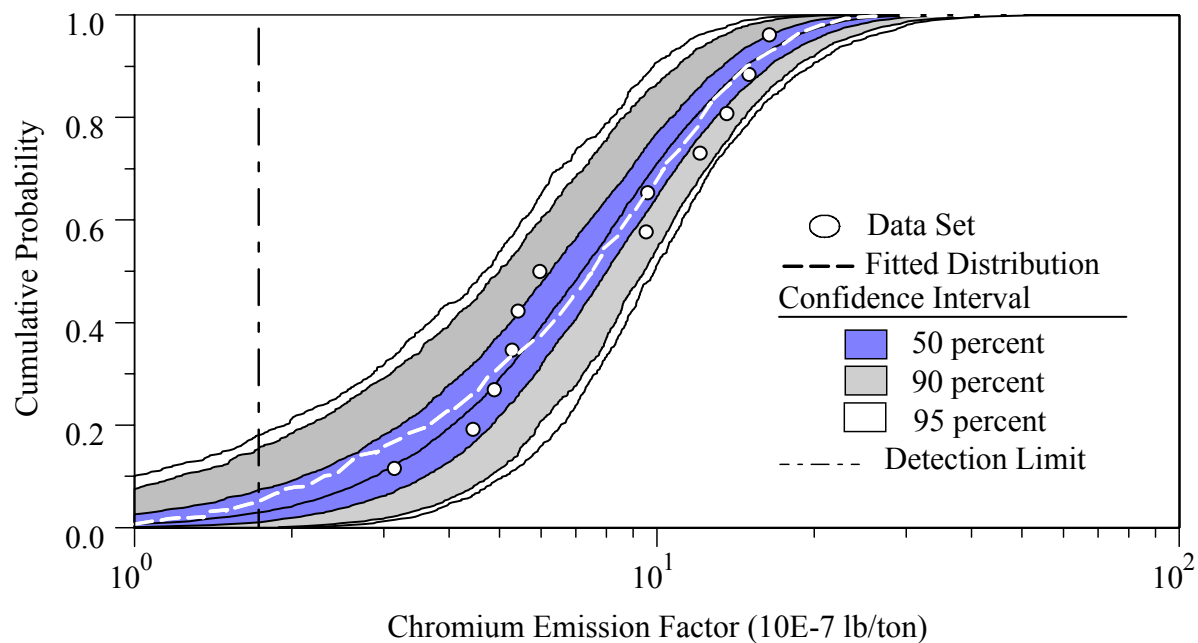

**Figure S-5.** Variability and Uncertainty in Chromium Emission Factor for Case 26 (Industrial boilers: residual oil) Estimated Based Upon a Gamma Distribution

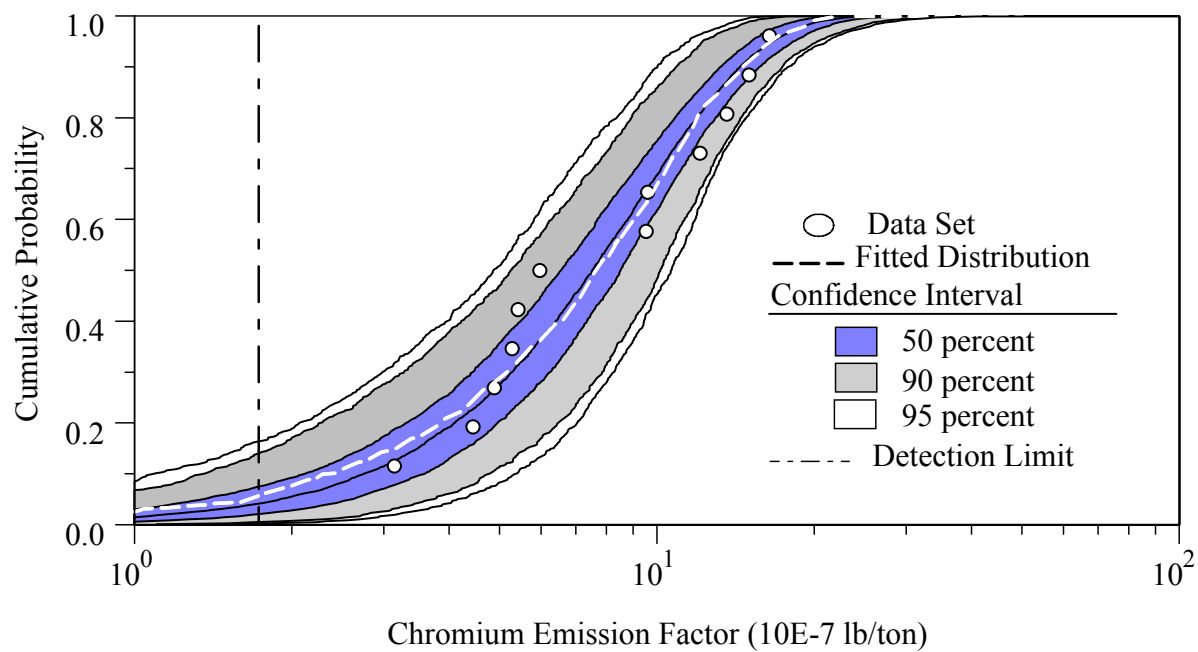

**Figure S-6.** Variability and Uncertainty in Chromium Emission Factor for Case 26 (Industrial boilers: residual oil) Estimated Based Upon a Weibull Distribution

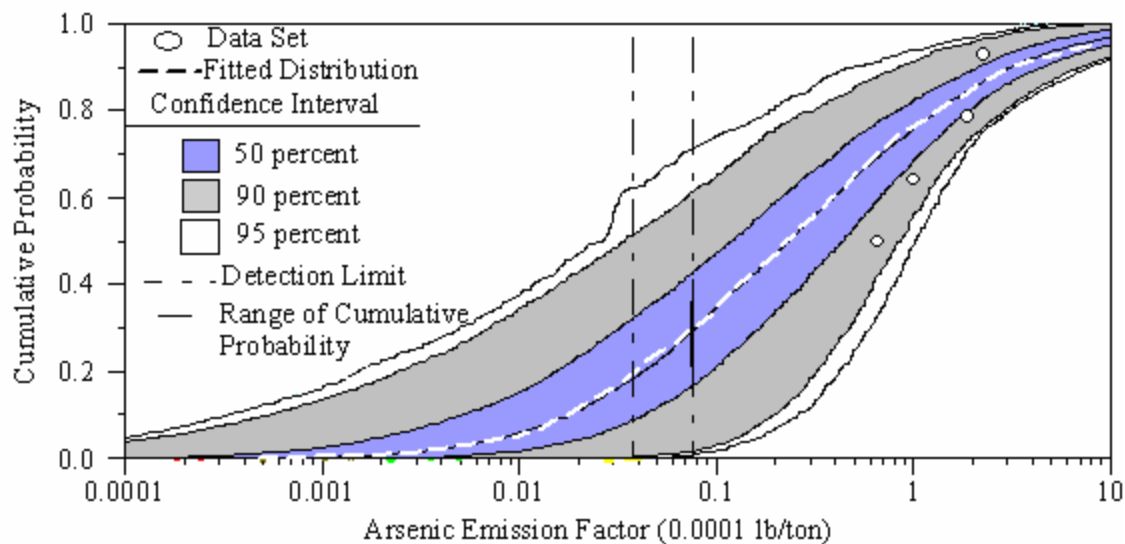

**Figure S-7.** Variability and Uncertainty in Arsenic Emission Factor for Case 14 (External Combustion Boilers-Industrial Wood) Estimated Based Upon a Lognormal Distribution

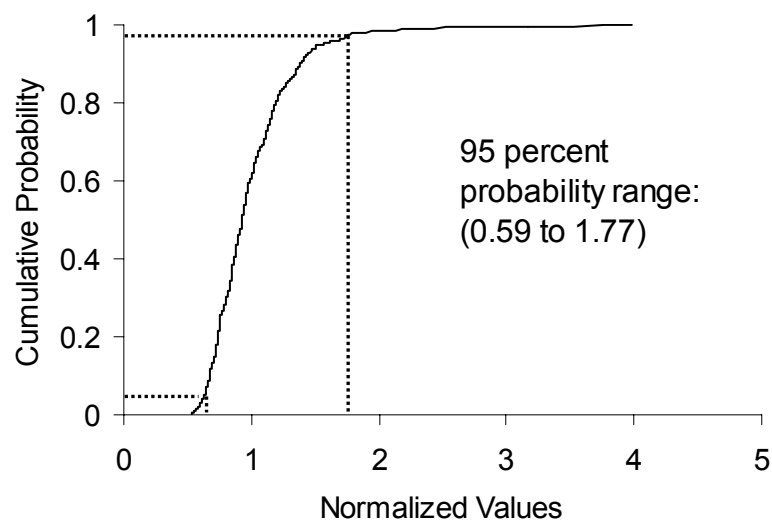

**Figure S-8.** Weighted Average Uncertainty Factor for Benzene Emissions for All Source Categories with Uncorrelated Surrogates

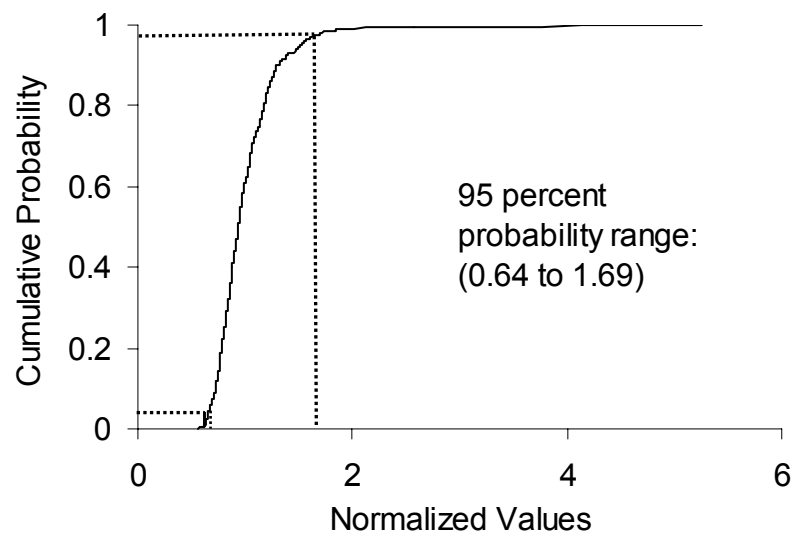

**Figure S-9.** Weighted Average Uncertainty Factor for Formaldehyde Emissions for All Source Categories with Correlated Surrogates

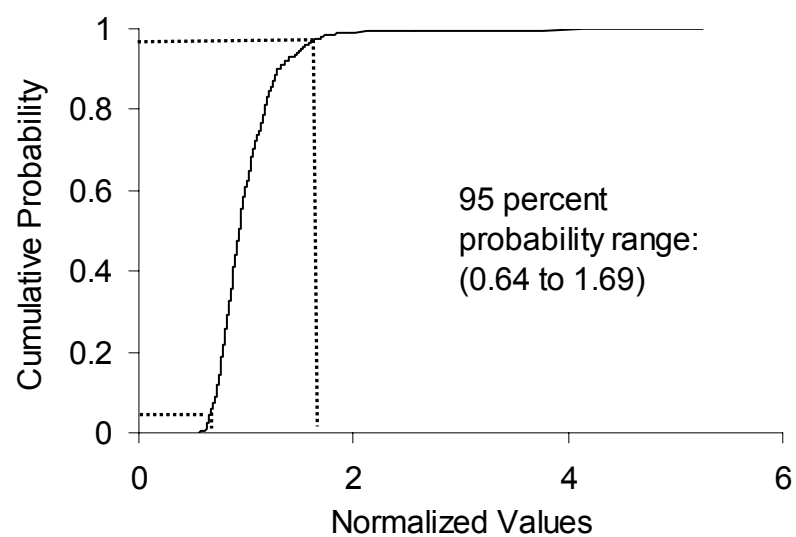

**Figure S-10.** Weighted Average Uncertainty Factor for Formaldehyde Emissions for All Source Categories with Uncorrelated Surrogates

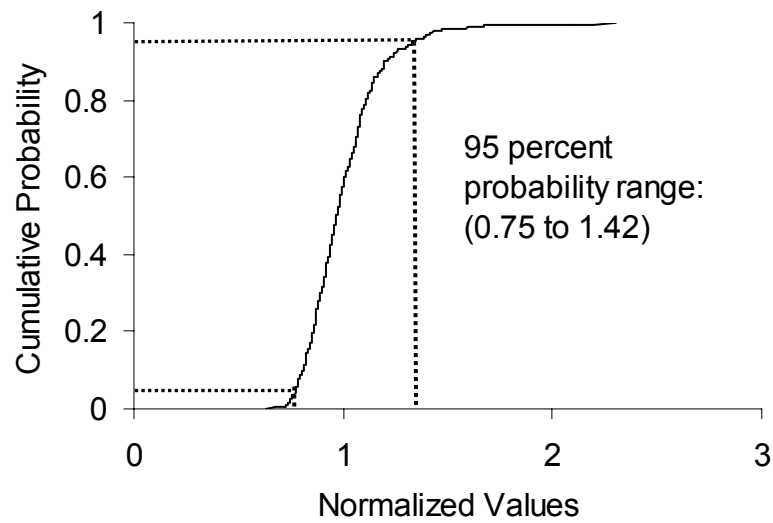

**Figure S-11.** Weighted Average Uncertainty Factor for Chromium Emissions for All Source Categories with Correlated Surrogates

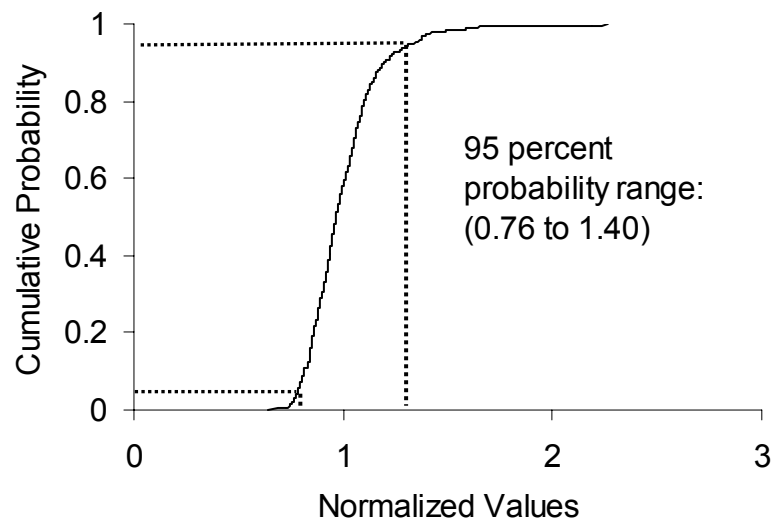

**Figure S-12.** Weighted Average Uncertainty Factor for Chromium Emissions for All Source Categories with Uncorrelated Surrogates



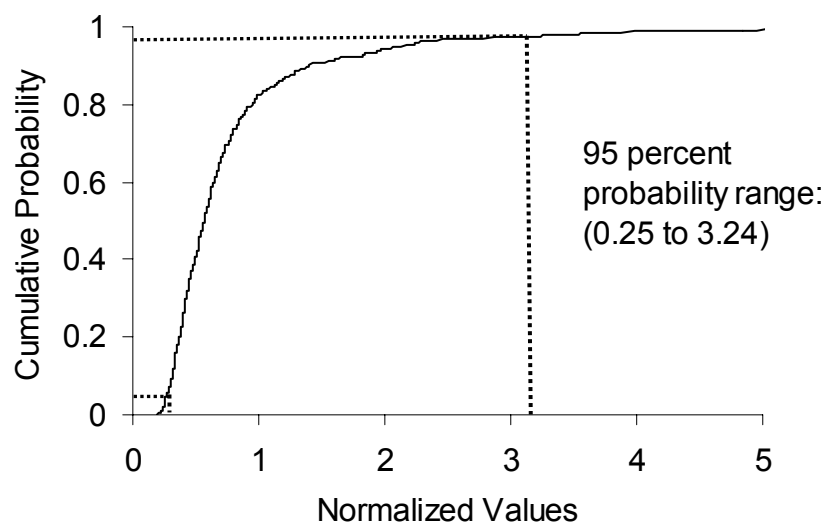

**Figure S-13.** Weighted Average Uncertainty Factor for Arsenic Emissions for All Source Categories with Correlated Surrogates

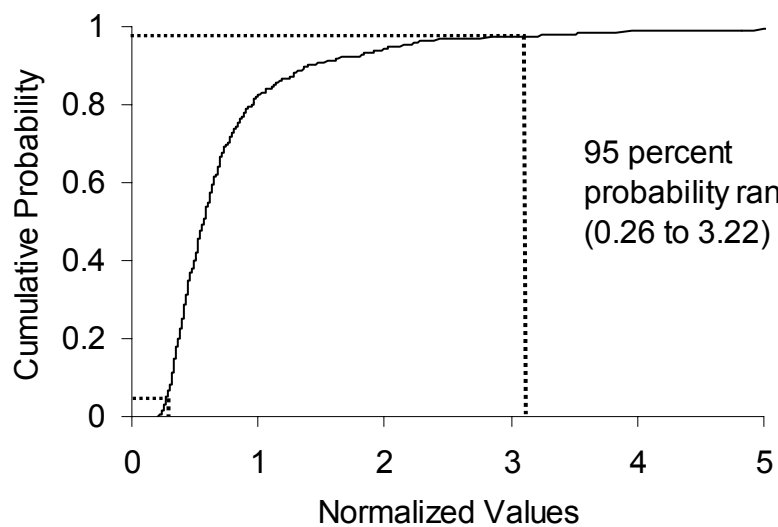

**Figure S-14.** Weighted Average Uncertainty Factor for Arsenic Emissions for All Source Categories with Uncorrelated Surrogates
